# Supplementary material
Source: PubMed Central journal article supplement (PMC3121373)
Supplement: supp_M111.239418_jbc.M111.239418-1.pdf [file supp_M111.239418_jbc.M111.239418-1.pdf]

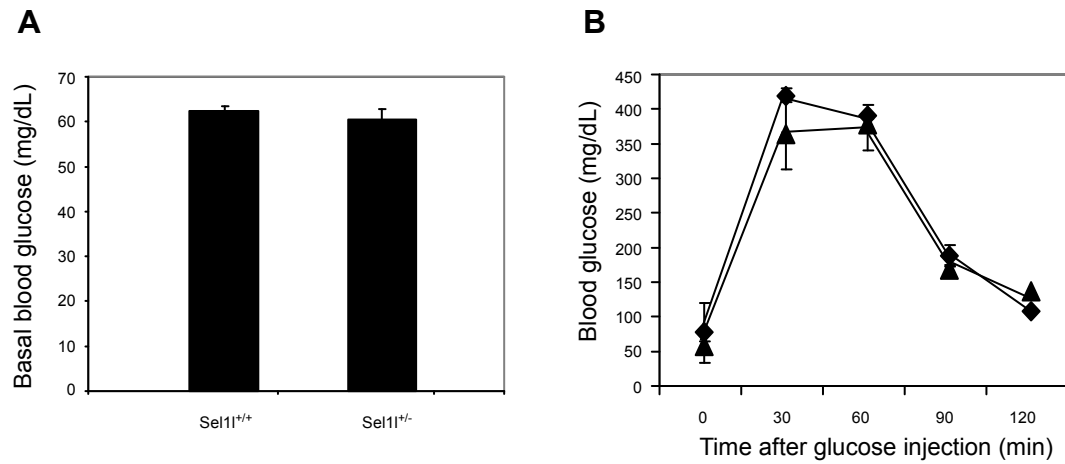

Fig. S1

(A) Basal fasting blood glucose of *Sel1l*<sup>+/+</sup> and *Sel1l*<sup>+/-</sup> mice. Male *Sel1l*<sup>+/+</sup> and *Sel1l*<sup>+/-</sup> mice of 10 weeks of age were fasted 6-8 hours and the blood glucose concentration were determined. (B) GTT of *Sel1l*<sup>+/+</sup> and *Sel1l*<sup>+/-</sup> mice on normal chow. No difference was detected between the two genotypes.

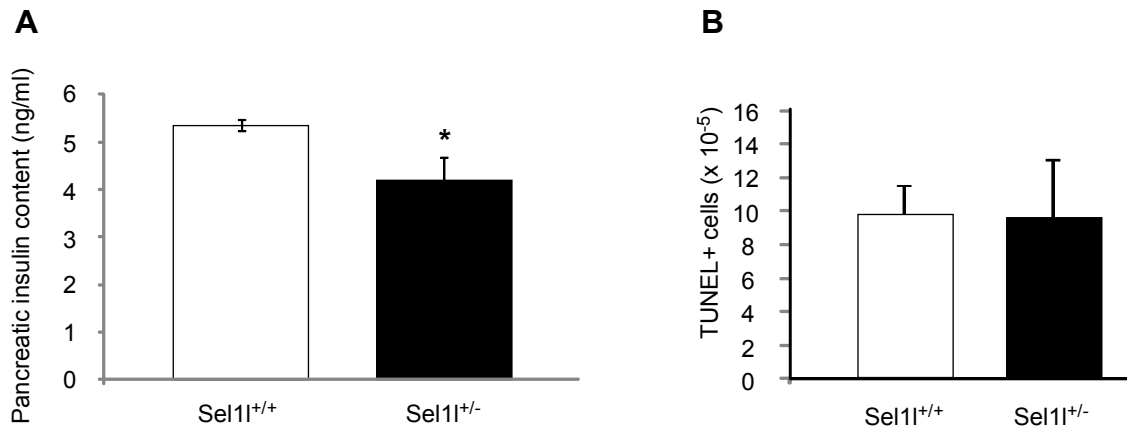

Fig. S2.

(A) Pancreatic insulin content of *Sel1l*<sup>+/+</sup> and *Sel1l*<sup>+/-</sup> mice fed with HFD for 20 weeks. Pancreatic insulin concentrations of *Sel1l*<sup>+/+</sup> and *Sel1l*<sup>+/-</sup> mice were determined as described in the Materials & Methods. The obtained values were normalized with total pancreatic protein concentration. \*,  $p < 0.05$  *Sel1l*<sup>+/-</sup> vs *Sel1l*<sup>+/+</sup> mice. (B) Ratio of apoptotic  $\beta$ -cells in *Sel1l*<sup>+/+</sup> and *Sel1l*<sup>+/-</sup> mice. Apoptosis was determined by TUNEL assay.

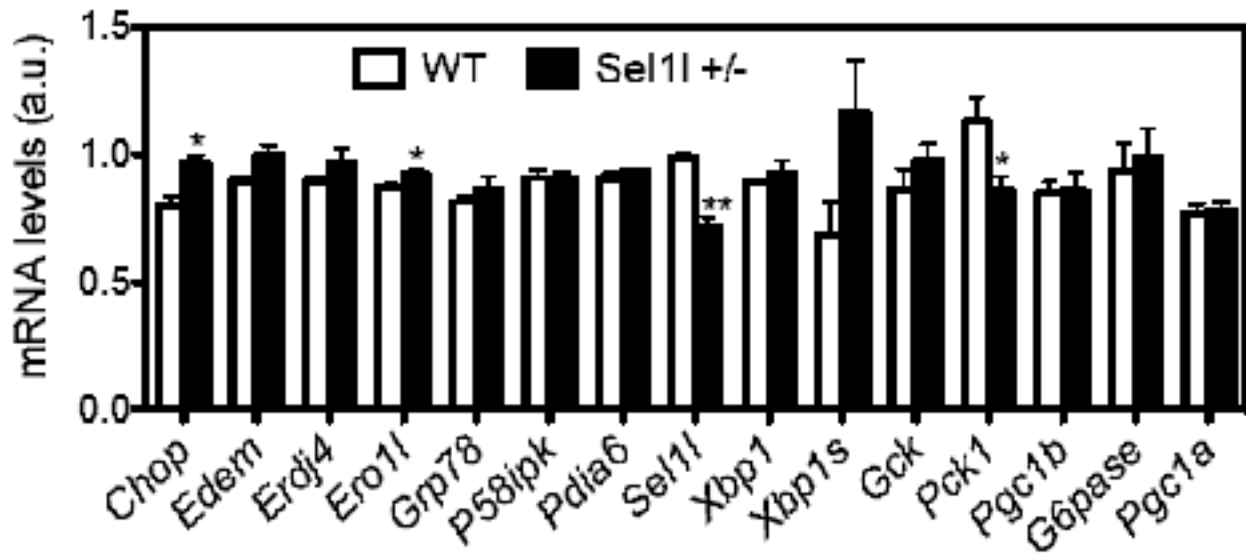

Fig. S3 Real-time PCR analysis of mRNA expression of UPR and other genes in livers of *Sel1l*<sup>+/+</sup> and *Sel1l*<sup>+/-</sup> mice. Male *Sel1l*<sup>+/+</sup> and *Sel1l*<sup>+/-</sup> mice of 10 weeks old were fed with HFD for 20 weeks. Liver mRNA expression levels of UPR (Chop, Edem, Erdj4, Ero1l, Grp78/Bip, p58ipk, Pdia6, Sel1l, Xbp1 and Xbp1s) and gluconeogenesis genes (Gck1, Pck1, Pgc1b, G6pase and Pgc1a) were determined by quantitative RT-PCR. \*,  $p < 0.05$  *Sel1l*<sup>+/+</sup> (n = 5) vs *Sel1l*<sup>+/-</sup> (n = 7) mice.
